# Supplementary material for: Past COVID-19: The Impact on IVF Outcomes Based on Follicular Fluid Lipid Profile
Source: MDPI journal article supplement (doi:10.3390/ijms24010010), 2022-12-20
Supplement: s1 [file s1]

## Supplementary materials.

### Past COVID-19: the impact on IVF outcomes based on follicular fluid lipid profile

Lomova N.A.<sup>1</sup>, Dolgushina N.V.<sup>1,2</sup>, Tokareva A.O.<sup>1</sup>, Chagovets V.V.<sup>1</sup>, Starodubtseva N.L.<sup>1,3</sup>, Kulikov I.A.<sup>1,2</sup>, Sukhikh G.T.<sup>1</sup>, Frankevich V.E.<sup>1,4</sup>

<sup>1</sup> National Medical Research Center of Obstetrics, Gynecology and Perinatology the name of Academician V.I. Kulakov, 117198 Moscow, Russia.

<sup>2</sup> Department of Obstetrics, Gynecology, Perinatology and Reproductology, Institute of professional education, Federal State Autonomous Educational Institution of Higher Education I.M. Sechenov First Moscow State Medical University of the Ministry of Health of the Russian Federation (Sechenov University), 119435 Moscow, Russia.

<sup>3</sup> *Moscow Institute of Physics and Technology, 141700 Moscow, Russia.*

<sup>4</sup> *Siberian State Medical University, 634050 Tomsk, Russia*

\*Correspondence: vfrankevich@gmail.com

Table S1. Lipid levels characterizing differences in history of SARS-COV-2

| Lipid               | No COVID-19           | Mild COVID-19         | Severe COVID-19       | p-value |
|---------------------|-----------------------|-----------------------|-----------------------|---------|
| Positive ion mode   |                       |                       |                       |         |
| CE 18:3             | 8.26e5(6.84e5;1.03e6) | 8.16e5(6.62e5;9.7e5)  | 9.1e5(7.71e5;1.16e6)  | 0.03    |
| PC 16:0 16:0        | 6.92e5(5.88e5;8.04e5) | 6.51e5(5.08e5;7.52e5) | 7.36e5(6.4e5;8.37e5)  | 0.003   |
| PC 16:0 18:1        | 7.74e6(5.96e6;9.65e6) | 7.29e6(5.79e6;9e6)    | 8.31e6(7.24e6;9.76e6) | 0.03    |
| PC 16:0 18:2        | 2.98e7(2.4e7;3.5e7)   | 2.67e7(2.28e7;3.23e7) | 3.05e7(2.5e7;3.6e7)   | 0.05    |
| PC 16:0 20:4        | 1.3e7(1.08e7;1.55e7)  | 1.17e7(9.84e6;1.45e7) | 1.39e7(1.18e7;1.63e7) | 0.01    |
| PC 18:0 20:3        | 1.87e6(1.22e6;2.93e6) | 1.67e6(9.99e5;2.68e6) | 2.91e6(2.04e6;3.6e6)  | <0.001  |
| PC 18:0 20:4        | 7.34e6(5.07e6;9.68e6) | 6.24e6(4.86e6;8.52e6) | 9.06e6(6.61e6;1.09e7) | 0.002   |
| PC 18:0 20:5        | 1.94e6(1.61e6;2.39e6) | 1.73e6(1.53e6;2.11e6) | 2.07e6(1.72e6;2.39e6) | 0.02    |
| PC 18:1 18:2        | 8.5e6(7.09e6;1.05e7)  | 7.58e6(6.38e6;9.37e6) | 9.55e6(7.71e6;1.04e7) | 0.01    |
| SM d20:5/24:0       | 4.76e5(3.12e5;8.17e5) | 3.85e5(2.32e5;6.42e5) | 5.51e5(3.73e5;8.02e5) | 0.01    |
| Negative ion mode   |                       |                       |                       |         |
| LPC 16:0            | 4.53e6(3.94e6;5.06e6) | 4.28e6(3.9e6;4.83e6)  | 4.65e6(4.31e6;5.17e6) | 0.01    |
| LPC 16:1            | 6.9e4(6.05e4;7.96e4)  | 6.97e4(5.39e4;8.23e4) | 7.37e4(6.89e4;8.43e4) | 0.02    |
| LPC 18:0            | 1.75e6(1.53e6;2e6)    | 1.71e6(1.52e6;1.92e6) | 1.85e6(1.7e6;2.17e6)  | 0.02    |
| MGDG 18:0 20:3      | 2.56e5(1.32e5;3.73e5) | 2.33e5(1.29e5;3.24e5) | 3.15e5(2.13e5;4.21e5) | 0.007   |
| MGDG 18:1 18:1      | 1.12e6(9.11e5;1.35e6) | 1.02e6(8.09e5;1.17e6) | 1.22e6(1.04e6;1.41e6) | 0.003   |
| OxPE 18:0 18:2(OOO) | 4.09e4(3.09e4;5.19e4) | 3.49e4(2.71e4;4.98e4) | 4.37e4(3.35e4;6.26e4) | 0.02    |
| OxPG 18:1 20:3(10)  | 1.22e5(1.08e5;1.41e5) | 1.18e5(1.02e5;1.35e5) | 1.34e5(1.19e5;1.56e5) | 0.010   |

|                |                       |                       |                       |        |
|----------------|-----------------------|-----------------------|-----------------------|--------|
| PC 16:0 18:2   | 4.78e6(3.88e6;5.64e6) | 4.19e6(3.52e6;5.12e6) | 4.76e6(4.05e6;5.63e6) | 0.012  |
| PC 16:0 22:5   | 6.56e5(5.23e5;8.93e5) | 5.77e5(4.98e5;7.12e5) | 7.23e5(5.9e5;9.24e5)  | 0.011  |
| PC 16:1 18:2   | 8.17e4(5.22e4;1.05e5) | 7.33e4(5.62e4;9.65e4) | 9.42e4(7.31e4;1.07e5) | 0.04   |
| PC 18:0 18:1   | 3.56e4(2.12e4;4.93e4) | 2.84e4(1.58e4;4.25e4) | 3.83e4(2.35e4;5.17e4) | 0.03   |
| PC 18:1 18:2   | 1.43e6(1.23e6;1.7e6)  | 1.29e6(1.1e6;1.58e6)  | 1.63e6(1.39e6;1.82e6) | <0.001 |
| PC O-16:0/20:4 | 2.35e5(1.97e5;2.79e5) | 2.21e5(1.91e5;2.6e5)  | 2.61e5(2.15e5;3.04e5) | 0.005  |
| PC O-16:1/20:4 | 1.85e5(1.43e5;2.24e5) | 1.72e5(1.41e5;2.1e5)  | 2.03e5(1.62e5;2.45e5) | 0.03   |
| PE 18:0 18:2   | 9.14e4(6.73e4;1.1e5)  | 7.55e4(6.12e4;9.89e4) | 8.78e4(6.99e4;1.18e5) | 0.02   |
| PE 18:0 20:4   | 7.19e4(4.93e4;9.39e4) | 5.44e4(4.19e4;7.56e4) | 7.65e4(6.39e4;1.03e5) | <0.001 |
| PE O-16:0/20:4 | 4.95e4(3.85e4;6.35e4) | 4.35e4(3.01e4;5.8e4)  | 6.26e4(4.35e4;7.97e4) | 0.001  |
| PE P-16:0/22:5 | 7.34e5(6.35e5;8.26e5) | 6.65e5(5.84e5;7.67e5) | 7.26e5(6.46e5;8.37e5) | 0.02   |
| PI 18:0 18:2   | 5.18e4(4.24e4;6.76e4) | 4.87e4(3.76e4;5.68e4) | 5.44e4(4.2e4;7.13e4)  | 0.03   |
| SM d16:1/18:0  | 1.66e6(1.45e6;1.85e6) | 1.52e6(1.3e6;1.72e6)  | 1.66e6(1.47e6;1.86e6) | 0.02   |
| SM d22:0/20:2  | 8.76e5(6.61e5;1.08e6) | 8.13e5(6.11e5;9.84e5) | 1e6(7.53e5;1.16e6)    | 0.04   |
| SM d22:0/20:3  | 5.7e5(4.51e5;7.69e5)  | 5.48e5(4.29e5;6.64e5) | 6.98e5(5.48e5;8.43e5) | 0.005  |
| SM d22:1/18:0  | 7.62e5(4.72e5;1.18e6) | 6.98e5(3.88e5;1.03e6) | 9.4e5(7.06e5;1.15e6)  | 0.03   |

Table S2. Lipid levels characterizing differences in FF in patients with no COVID-19 and mild COVID-19.

| Lipid             | No COVID-19           | Mild COVID-19         | p-value |
|-------------------|-----------------------|-----------------------|---------|
| Positive ion mode |                       |                       |         |
| PC 16:0 16:0      | 6.92e5(5.88e5;8.04e5) | 6.51e5(5.08e5;7.52e5) | 0.01    |
| PC 16:0 18:2      | 2.98e7(2.4e7;3.5e7)   | 2.67e7(2.28e7;3.23e7) | 0.04    |
| PC 18:1 18:2      | 8.5e6(7.09e6;1.05e7)  | 7.58e6(6.38e6;9.37e6) | 0.02    |
| SM d20:5/24:0     | 4.76e5(3.12e5;8.17e5) | 3.85e5(2.32e5;6.42e5) | 0.02    |
| Negative ion mode |                       |                       |         |
| MGDG 18:1 18:1    | 1.12e6(9.11e5;1.35e6) | 1.02e6(8.09e5;1.17e6) | 0.02    |
| PC 16:0 18:2      | 4.78e6(3.88e6;5.64e6) | 4.19e6(3.52e6;5.12e6) | 0.01    |
| PC 18:1 18:2      | 1.43e6(1.23e6;1.7e6)  | 1.29e6(1.1e6;1.58e6)  | 0.01    |
| PE 18:0 18:2      | 9.14e4(6.73e4;1.1e5)  | 7.55e4(6.12e4;9.89e4) | 0.01    |
| PE 18:0 20:4      | 7.19e4(4.93e4;9.39e4) | 5.44e4(4.19e4;7.56e4) | 0.003   |
| PE O-16:0/20:4    | 4.95e4(3.85e4;6.35e4) | 4.35e4(3.01e4;5.8e4)  | 0.03    |
| PE P-16:0/22:5    | 7.34e5(6.35e5;8.26e5) | 6.65e5(5.84e5;7.67e5) | 0.01    |
| PI 18:0 18:2      | 5.18e4(4.24e4;6.76e4) | 4.87e4(3.76e4;5.68e4) | 0.03    |
| SM d16:1/18:0     | 1.66e6(1.45e6;1.85e6) | 1.52e6(1.3e6;1.72e6)  | 0.02    |

Table S3. Lipid levels characterizing differences in follicular fluid in asymptomatic patients and patients with severe COVID-19.

| Lipid             | No COVID-19           | Severe COVID-19       | p-value |
|-------------------|-----------------------|-----------------------|---------|
| Positive ion mode |                       |                       |         |
| CE 18:3           | 8.26e5(6.84e5;1.03e6) | 9.1e5(7.71e5;1.16e6)  | 0.03    |
| LPC 16:1          | 2.85e5(2.5e5;3.27e5)  | 3.18e5(2.81e5;3.51e5) | 0.02    |
| PC 18:0 20:3      | 1.87e6(1.22e6;2.93e6) | 2.91e6(2.04e6;3.6e6)  | <0.001  |

|                    |                       |                       |       |
|--------------------|-----------------------|-----------------------|-------|
| PC 18:0 20:4       | 7.34e6(5.07e6;9.68e6) | 9.06e6(6.61e6;1.09e7) | 0.008 |
| Negative ion mode  |                       |                       |       |
| LPC 16:1           | 6.9e4(6.05e4;7.96e4)  | 7.37e4(6.89e4;8.43e4) | 0.006 |
| LPC 18:0           | 1.75e6(1.53e6;2e6)    | 1.85e6(1.7e6;2.17e6)  | 0.04  |
| MGDG 18:0 20:3     | 2.56e5(1.32e5;3.73e5) | 3.15e5(2.13e5;4.21e5) | 0.007 |
| OxPG 18:1 20:3(1O) | 1.22e5(1.08e5;1.41e5) | 1.34e5(1.19e5;1.56e5) | 0.04  |
| PC O-16:0/18:1     | 6.11e4(2.52e4;8.27e4) | 6.96e4(4.06e4;9.25e4) | 0.05  |
| PC O-16:0/20:4     | 2.35e5(1.97e5;2.79e5) | 2.61e5(2.15e5;3.04e5) | 0.04  |
| PE O-16:0/20:4     | 4.95e4(3.85e4;6.35e4) | 6.26e4(4.35e4;7.97e4) | 0.02  |
| SM d22:0/20:3      | 5.7e5(4.51e5;7.69e5)  | 6.98e5(5.48e5;8.43e5) | 0.01  |

Table S4. Lipid levels characterizing differences in follicular fluid in patients with different forms of COVID-19.

| Lipid             | Mild COVID-19         | Severe COVID-19       | p-value |
|-------------------|-----------------------|-----------------------|---------|
| Positive ion mode |                       |                       |         |
| CE 18:0           | 4.75e5(3.87e5;5.82e5) | 5.49e5(4.42e5;6.35e5) | 0.04    |
| CE 18:3           | 8.16e5(6.62e5;9.7e5)  | 9.1e5(7.71e5;1.16e6)  | 0.009   |
| CE 20:4           | 5.46e6(4.44e6;6.37e6) | 6.00e6(4.85e6;7.09e6) | 0.03    |
| LPC 16:0          | 2.88e6(2.63e6;3.17e6) | 3.01e6(2.81e6;3.46e6) | 0.03    |
| LPC 18:0          | 7.01e6(6.21e6;8.2e6)  | 7.7e6(6.65e6;8.95e6)  | 0.02    |
| OxLPC 22:5(OH)    | 2.31e5(2.1e5;2.53e5)  | 2.42e5(2.26e5;2.75e5) | 0.03    |
| PC O-16:0/20:4    | 1.39e6(1.1e6;1.65e6)  | 1.65e6(1.19e6;1.99e6) | 0.02    |
| PC 16:0 16:0      | 6.51e5(5.08e5;7.52e5) | 7.36e5(6.4e5;8.37e5)  | 0.002   |
| PC 16:0 18:1      | 7.29e6(5.79e6;9e6)    | 8.31e6(7.24e6;9.76e6) | 0.005   |
| PC 16:0 18:2      | 2.67e7(2.28e7;3.23e7) | 3.05e7(2.5e7;3.6e7)   | 0.03    |
| PC 16:0 20:4      | 1.17e7(9.84e6;1.45e7) | 1.39e7(1.18e7;1.63e7) | 0.003   |
| PC 16:0 20:5      | 2.95e6(2.55e6;3.64e6) | 3.34e6(2.77e6;4.02e6) | 0.02    |
| PC 16:0 22:5      | 3.44e6(2.79e6;4.53e6) | 4.11e6(3.28e6;5.19e6) | 0.03    |
| PC 16:1 18:2      | 4.27e5(3.42e5;6.03e5) | 5.37e5(4.24e5;6.68e5) | 0.01    |
| PC 16:1 22:6      | 1.33e6(9.75e5;1.61e6) | 1.56e6(1.15e6;1.82e6) | 0.01    |
| PC 18:0 18:1      | 1.75e6(1.36e6;2.22e6) | 2.09e6(1.61e6;2.47e6) | 0.02    |
| PC 18:0 18:2      | 1.5e7(8.41e6;1.81e7)  | 1.76e7(1.13e7;2.12e7) | 0.02    |
| PC 18:0 20:3      | 1.67e6(9.99e5;2.68e6) | 2.91e6(2.04e6;3.6e6)  | <0.001  |
| PC 18:0 20:4      | 6.24e6(4.86e6;8.52e6) | 9.06e6(6.61e6;1.09e7) | <0.001  |
| PC 18:0 20:5      | 1.73e6(1.53e6;2.11e6) | 2.07e6(1.72e6;2.39e6) | 0.006   |
| PC 18:1 18:2      | 7.58e6(6.38e6;9.37e6) | 9.55e6(7.71e6;1.04e7) | 0.003   |
| SM d16:0/16:1     | 3.93e5(3.46e5;4.84e5) | 4.47e5(3.98e5;5.3e5)  | 0.04    |
| SM d18:1/22:0     | 1.74e6(3.86e5;2.89e6) | 2.49e6(8.76e5;4.52e6) | 0.04    |
| SM d18:2/16:0     | 8e5(7.24e5;9.76e5)    | 8.84e5(7.87e5;1.04e6) | 0.03    |
| SM d18:2/24:1     | 1.5e6(1.09e6;2.1e6)   | 1.79e6(1.2e6;2.98e6)  | 0.05    |
| SM d20:5/24:0     | 3.85e5(2.32e5;6.42e5) | 5.51e5(3.73e5;8.02e5) | 0.006   |
| Negative ion mode |                       |                       |         |
| LPC 16:0          | 4.28e6(3.9e6;4.83e6)  | 4.65e6(4.31e6;5.17e6) | 0.002   |
| LPC 16:1          | 6.97e4(5.39e4;8.23e4) | 7.37e4(6.89e4;8.43e4) | 0.03    |
| LPC 18:0          | 1.71e6(1.52e6;1.92e6) | 1.85e6(1.7e6;2.17e6)  | 0.005   |

|                        |                       |                       |        |
|------------------------|-----------------------|-----------------------|--------|
| LPC 18:1               | 6.81e5(6.17e5;8.37e5) | 7.79e5(6.71e5;9.07e5) | 0.025  |
| LPC 20:4               | 2.93e5(2.42e5;3.81e5) | 3.21e5(2.83e5;4.35e5) | 0.04   |
| LPC P-16:0             | 4.13e4(3.6e4;4.96e4)  | 4.77e4(3.75e4;5.38e4) | 0.03   |
| MGDG 18:0 20:3         | 2.33e5(1.29e5;3.24e5) | 3.15e5(2.13e5;4.21e5) | 0.003  |
| MGDG 18:1 18:1         | 1.02e6(8.09e5;1.17e6) | 1.22e6(1.04e6;1.41e6) | 0.001  |
| OxPC<br>18:2 16:1(OO)  | 2.82e5(2.22e5;3.7e5)  | 3.39e5(2.61e5;3.99e5) | 0.03   |
| OxPE<br>18:0 18:2(OOO) | 3.49e4(2.71e4;4.98e4) | 4.37e4(3.35e4;6.26e4) | 0.007  |
| OxPG 18:1 20:3(1O)     | 1.18e5(1.02e5;1.35e5) | 1.34e5(1.19e5;1.56e5) | 0.003  |
| PC 16:0 18:2           | 4.19e6(3.52e6;5.12e6) | 4.76e6(4.05e6;5.63e6) | 0.01   |
| PC 16:0 22:5           | 5.77e5(4.98e5;7.12e5) | 7.23e5(5.9e5;9.24e5)  | 0.003  |
| PC 16:1 18:2           | 7.33e4(5.62e4;9.65e4) | 9.42e4(7.31e4;1.07e5) | 0.009  |
| PC 18:0 18:1           | 2.84e4(1.58e4;4.25e4) | 3.83e4(2.35e4;5.17e4) | 0.009  |
| PC 18:0 18:2           | 2.24e6(1.6e6;2.95e6)  | 2.66e6(2e6;3.54e6)    | 0.02   |
| PC 18:1 18:2           | 1.29e6(1.1e6;1.58e6)  | 1.63e6(1.39e6;1.82e6) | 0.000  |
| PC O-16:0/20:4         | 2.21e5(1.91e5;2.6e5)  | 2.61e5(2.15e5;3.04e5) | 0.001  |
| PC O-16:1/20:4         | 1.72e5(1.41e5;2.1e5)  | 2.03e5(1.62e5;2.45e5) | 0.009  |
| PC P-18:1/20:4         | 9.78e4(6.08e4;1.27e5) | 1.18e5(8.28e4;1.44e5) | 0.04   |
| PE 18:0 18:2           | 7.55e4(6.12e4;9.89e4) | 8.78e4(6.99e4;1.18e5) | 0.02   |
| PE 18:0 20:4           | 5.44e4(4.19e4;7.56e4) | 7.65e4(6.39e4;1.03e5) | <0.001 |
| PE O-16:0/20:4         | 4.35e4(3.01e4;5.8e4)  | 6.26e4(4.35e4;7.97e4) | <0.001 |
| PE P-16:0/22:5         | 6.65e5(5.84e5;7.67e5) | 7.26e5(6.46e5;8.37e5) | 0.020  |
| PI 18:0 18:2           | 4.87e4(3.76e4;5.68e4) | 5.44e4(4.2e4;7.13e4)  | 0.02   |
| SM d16:1/18:0          | 1.52e6(1.3e6;1.72e6)  | 1.66e6(1.47e6;1.86e6) | 0.02   |
| SM d18:4/20:4          | 2.32e4(1.83e4;2.9e4)  | 2.66e4(2.3e4;3.06e4)  | 0.010  |
| SM d22:0/20:2          | 8.13e5(6.11e5;9.84e5) | 1.00e6(7.53e5;1.16e6) | 0.009  |
| SM d22:0/20:3          | 5.48e5(4.29e5;6.64e5) | 6.98e5(5.48e5;8.43e5) | 0.001  |
| SM d22:1/18:0          | 6.98e5(3.88e5;1.03e6) | 9.4e5(7.06e5;1.15e6)  | 0.006  |
| SM d22:6/18:2          | 7.13e4(5.72e4;8.37e4) | 7.82e4(6.83e4;8.72e4) | 0.03   |
| SM d22:6/20:3          | 3.39e4(2.71e4;7.61e4) | 6.07e4(3.12e4;8.66e4) | 0.04   |
| SM d24:1/18:0          | 2.77e5(2.06e5;3.31e5) | 3.09e5(2.71e5;3.47e5) | 0.04   |
